# Supplementary material
Source: PubMed Central journal article supplement (PMC4102335)
Supplement: NIHMS597127-supplement-supplement_1.pdf [file NIHMS597127-supplement-supplement_1.pdf]

## **SUPPLEMENTAL FIGURE LEGENDS**

Figure S1. (A) Human placenta stained with the rabbit PD-L1 monoclonal antibody (original lot concentration of 0.22 mg/ml) and showing membrane staining of syncytiotrophoblasts and, (B) the same case stained with the mouse PD-L1 monoclonal antibody (original lot concentration of 0.65 mg/ml). (C) Human tonsil stained with the rabbit PD-L1 monoclonal antibody (original lot concentration of 1.55 mg/ml) and, (D) stained with the rabbit PD-L1 monoclonal antibody (original lot concentration of 0.22 mg/ml) and, (E) stained with the mouse PD-L1 monoclonal antibody (original lot concentration of 0.65 mg/ml).

Figure S2. (A-C) Case of classical Hodgkin lymphoma stained with (A) the rabbit PD-L1 monoclonal antibody (original lot concentration of 1.55 mg/ml), (B) the rabbit PD-L1 monoclonal antibody (original lot concentration of 0.22 mg/ml), and (C) the mouse PD-L1 monoclonal antibody (original lot concentration of 0.65 mg/ml). (E-F) Case of EBV-negative PTLN stained with (D) the rabbit PD-L1 monoclonal antibody (original lot concentration of 1.55 mg/ml), (E) the rabbit PD-L1 monoclonal antibody (original lot concentration of 0.22 mg/ml), and (F) the mouse PD-L1 monoclonal antibody (original lot concentration of 0.65 mg/ml).

# Supplemental Figure S1

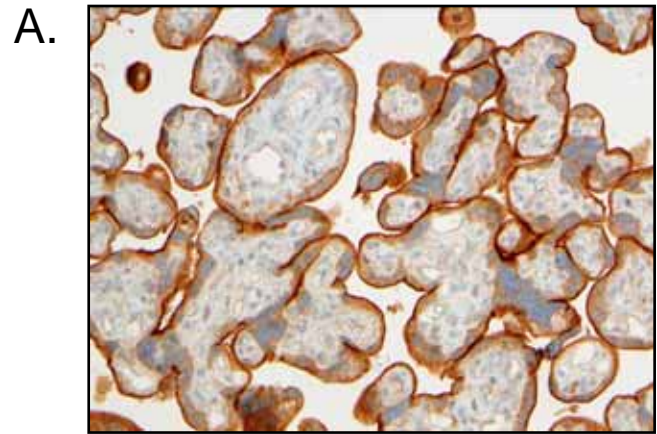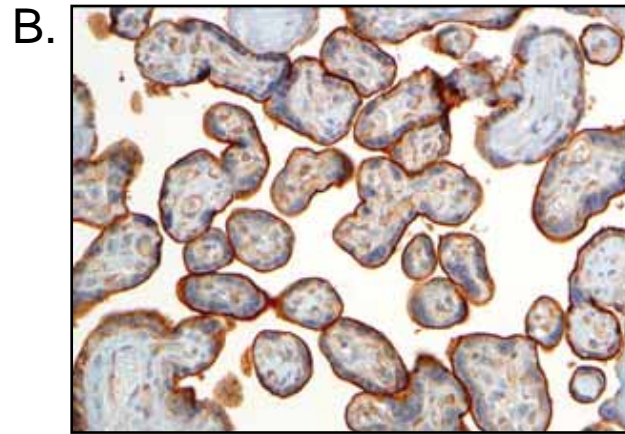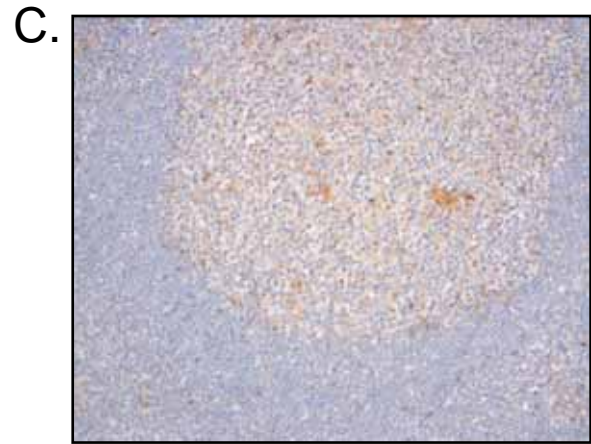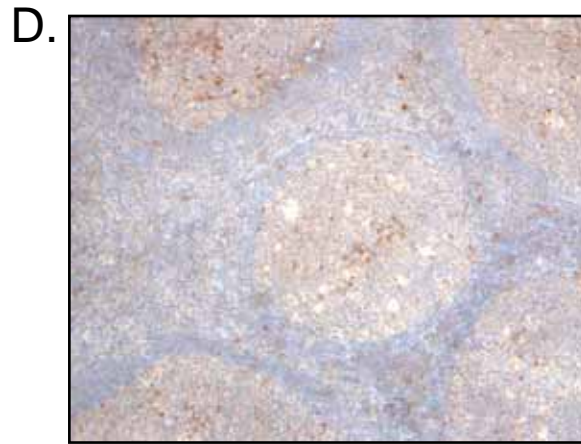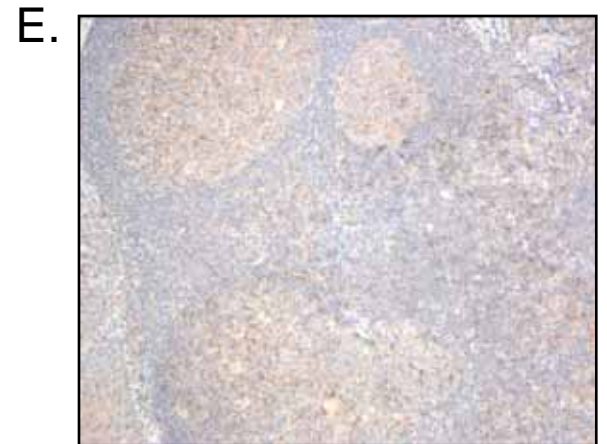

# Supplemental Figure S2

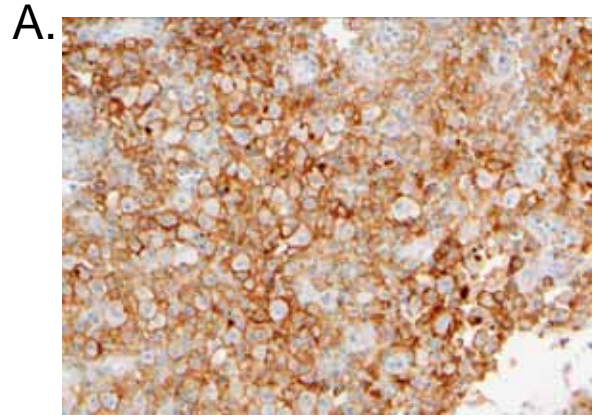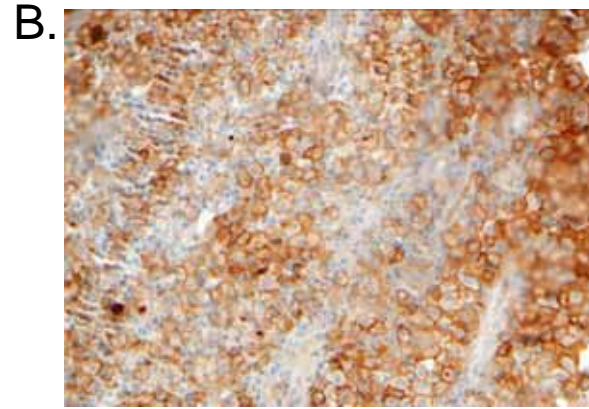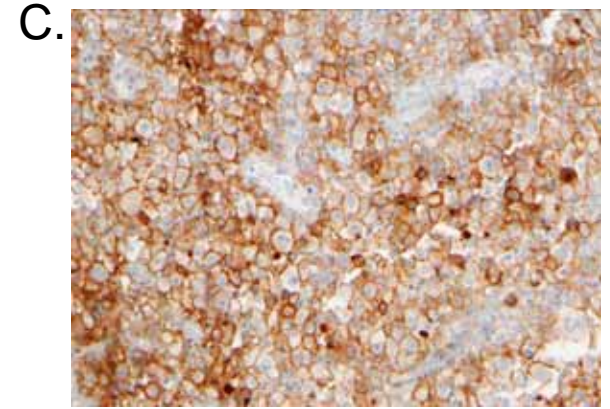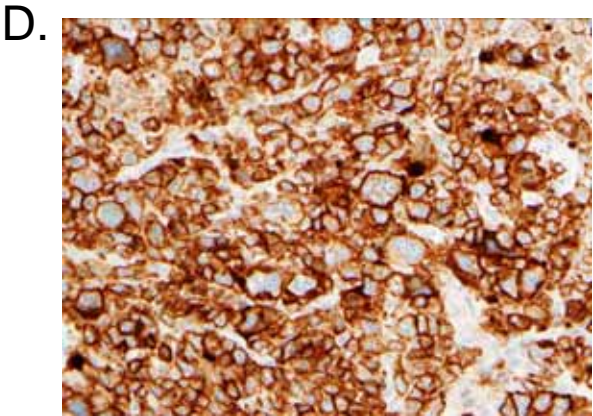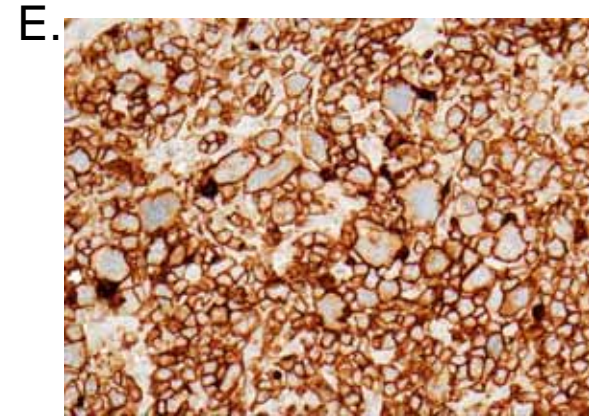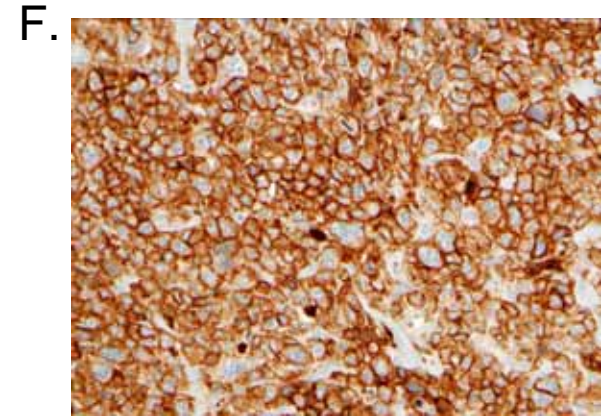

Supplemental Table 1. Pathological Characteristics and PD-L1 Expression in Hodgkin Lymphomas and Related Cases

| Diagnosis | Case # | EBV status | % malignant cells | % malignant cells positive * | % total tumor cellularity positive** |
|-----------|--------|------------|-------------------|------------------------------|--------------------------------------|
| NSCHL     | 1      | -          | 20                | 95                           | 80                                   |
|           | 2      | -          | 5                 | 95                           | 70                                   |
|           | 3      | -          | 2                 | 90                           | 70                                   |
|           | 4      | -          | 5                 | 95                           | 60                                   |
|           | 5      | +          | 5                 | 95                           | 50                                   |
|           | 6      | nd         | 10                | 90                           | 40                                   |
|           | 7      | +          | 5                 | 90                           | 40                                   |
|           | 8      | +          | 5                 | 50                           | 40                                   |
|           | 9      | -          | 2                 | 95                           | 40                                   |
|           | 10     | -          | 10                | 95                           | 30                                   |
|           | 11     | -          | 10                | 95                           | 30                                   |
|           | 12     | +          | 2                 | 95                           | 30                                   |
|           | 13     | nd         | 2                 | 0                            | 30                                   |
|           | 14     | -          | 10                | 95                           | 20                                   |
|           | 15     | -          | 10                | 95                           | 20                                   |
|           | 16     | +          | 5                 | 95                           | 20                                   |
|           | 17     | nd         | 5                 | 95                           | 20                                   |
|           | 18     | -          | 5                 | 90                           | 20                                   |
|           | 19     | +          | 2                 | 90 (1+/M)***                 | 20                                   |
|           | 20     | +          | 5                 | 95                           | 10                                   |
|           | 21     | -          | 5                 | 90                           | 10                                   |
|           | 22     | -          | 2                 | 90 (2+/C)***                 | 10                                   |
|           | 23     | -          | 2                 | 80                           | 10                                   |
|           | 24     | nd         | 5                 | 10                           | 5                                    |
|           | 25     | -          | 2                 | 20 (1+/C)***                 | 2                                    |
| MCCHL     | 1      | +          | 2                 | 95                           | 80                                   |
|           | 2      | +          | 10                | 90                           | 70                                   |
|           | 3      | -          | 10                | 80                           | 70                                   |
|           | 4      | +          | 2                 | 90                           | 70                                   |
|           | 5      | -          | 2                 | 95                           | 60                                   |
|           | 6      | +          | 2                 | 90                           | 40                                   |
|           | 7      | -          | 2                 | 70                           | 20                                   |
|           | 8      | -          | 2                 | 90 (1+/C)***                 | 10                                   |
| CHL-NOS   | 1      | -          | 90                | 90                           | 90                                   |
|           | 2      | -          | 90                | 90                           | 90                                   |
|           | 3      | -          | 50                | 90                           | 90                                   |
|           | 4      | -          | 10                | 50                           | 80                                   |
|           | 5      | +          | 2                 | 95                           | 50                                   |
| NLPHL     | 1      | -          | 5                 | 2                            | 20                                   |
|           | 2      | nd         | 2                 | 20 (1+/M)***                 | 10                                   |

|         |    |    |    |               |    |
|---------|----|----|----|---------------|----|
|         | 3  | -  | 2  | 5             | 10 |
|         | 4  | nd | 2  | 5             | 10 |
|         | 5  | nd | 2  | 0             | 10 |
|         | 6  | -  | 2  | 0             | 10 |
|         | 7  | -  | 2  | 0             | 10 |
|         | 8  | nd | 2  | 0             | 10 |
|         | 9  | nd | 2  | 0             | 5  |
|         | 10 | nd | 2  | 0             | 5  |
|         | 11 | nd | 2  | 0             | 5  |
|         | 12 | nd | 2  | 0             | 5  |
|         | 13 | -  | 2  | 0             | 5  |
|         | 14 | -  | 2  | 0             | 5  |
|         | 15 | -  | 2  | 0             | 5  |
| PMBCL   | 1  | nd | 90 | 90 (2+/C) *** | 90 |
|         | 2  | nd | 90 | 90            | 90 |
|         | 3  | -  | 90 | 90 (2+/C) *** | 90 |
|         | 4  | nd | 90 | 90 (1+/M) *** | 90 |
|         | 5  | nd | 90 | 90            | 90 |
|         | 6  | nd | 90 | 90            | 90 |
|         | 7  | -  | 90 | 90            | 90 |
|         | 8  | nd | 80 | 90            | 90 |
|         | 9  | nd | 90 | 80            | 90 |
|         | 10 | -  | 80 | 80            | 90 |
|         | 11 | nd | 20 | 50            | 90 |
|         | 12 | nd | 90 | 80            | 80 |
|         | 13 | -  | 80 | 70            | 80 |
|         | 14 | -  | 80 | 70            | 70 |
|         | 15 | -  | 80 | 30            | 70 |
|         | 16 | nd | 60 | 70            | 60 |
|         | 17 | nd | 90 | 50 (2+/C) *** | 50 |
|         | 18 | nd | 70 | 20 (2+/C) *** | 30 |
|         | 19 | nd | 80 | 10            | 30 |
|         | 20 | nd | 90 | 10            | 10 |
|         | 21 | nd | 90 | 0             | 5  |
| TCHRBCL | 1  | nd | 50 | 90            | 90 |
|         | 2  | -  | 5  | 5             | 80 |
|         | 3  | nd | 5  | 90            | 70 |
|         | 4  | -  | 5  | 10            | 70 |
|         | 5  | -  | 20 | 50            | 60 |
|         | 6  | -  | 10 | 90            | 60 |
|         | 7  | nd | 10 | 50            | 60 |
|         | 8  | nd | 30 | 80            | 50 |
|         | 9  | nd | 5  | 50            | 50 |
|         | 10 | -  | 20 | 0             | 40 |
|         | 11 | -  | 20 | 5             | 30 |

\*  $\geq 2+$  membranous staining; \*\*  $\geq 2+$  membranous and/or cytoplasmic staining; \*\*\* scored as negative; NSCHL - nodular sclerosis classical Hodgkin lymphoma (CHL);

MCCHL - mixed cellularity CHL; NOS - not otherwise specified; NLPHL - nodular lymphocyte predominant Hodgkin lymphoma; PMBCL - primary mediastinal large B-cell lymphoma; TCHRBCCL - T-cell/histiocyte-rich large B-cell lymphoma; nd - not determined; M - membranous; C - cytoplasmic; gray shading denotes cases scored as negative in either malignant cells and/or total cellularity.

Supplemental Table 2. Pathological Characteristics and PD-L1 Expression in Non-Hodgkin Lymphoma Cases

| Diagnosis     | Case # | EBV status | % malignant cells | % malignant cells positive * | % total tumor cellularity positive** |
|---------------|--------|------------|-------------------|------------------------------|--------------------------------------|
| EBV+ DLBCL    | 1      | +          | 90                | 90                           | 90                                   |
|               | 2      | +          | 90                | 90                           | 90                                   |
|               | 3      | +          | 90                | 90                           | 85                                   |
|               | 4      | +          | 80                | 80                           | 80                                   |
|               | 5      | +          | 80                | 70                           | 80                                   |
|               | 6      | +          | 40                | 30                           | 80                                   |
|               | 7      | +          | 40                | 80                           | 70                                   |
|               | 8      | +          | 40                | 20                           | 70                                   |
|               | 9      | +          | 90                | 60                           | 60                                   |
|               | 10     | +          | 70                | 30                           | 60                                   |
|               | 11     | +          | 70                | 20                           | 50                                   |
|               | 12     | +          | 70                | 20                           | 50                                   |
|               | 13     | +          | 60                | 20                           | 40                                   |
|               | 14     | +          | 70                | 10                           | 40                                   |
|               | 15     | +          | 50                | 10                           | 40                                   |
|               | 16     | +          | 70                | 5                            | 40                                   |
| EBV+ PTL D    | 1      | +          | 90                | 90 (2+/C) ***                | 90                                   |
|               | 2      | +          | 90                | 90                           | 90                                   |
|               | 3      | +          | 90                | 90                           | 90                                   |
|               | 4      | +          | 90                | 90                           | 90                                   |
|               | 5      | +          | 90                | 90                           | 85                                   |
|               | 6      | +          | 90                | 80                           | 80                                   |
|               | 7      | +          | 90                | 80                           | 80                                   |
|               | 8      | +          | 80                | 20 (1+/M) ***                | 30 (1+/M) ***                        |
|               | 9      | +          | 90                | 20 (1+/M) ***                | 20 (1+/M) ***                        |
|               | 10     | +          | 90                | 0                            | 0                                    |
| EBV-neg PTL D | 1      | -          | 95                | 95                           | 95                                   |
|               | 2      | -          | 90                | 90 (1+/C) ***                | 90 (1+/C) ***                        |
|               | 3      | -          | 90                | 90 (1+/C) ***                | 85 (1+/C) ***                        |
|               | 4      | -          | 80                | 90                           | 80                                   |
|               | 5      | -          | 80                | 30                           | 60                                   |
|               | 6      | -          | 80                | 10                           | 50                                   |
|               | 7      | -          | 90                | 0                            | 0                                    |
| DLBCL-NOS     | 1      | -          | 95                | 95                           | 95                                   |
|               | 2      | -          | 90                | 90                           | 95                                   |
|               | 3      | -          | 90                | 90 (1+/C) ***                | 90 (1+/C) ***                        |
|               | 4      | -          | 90                | 90 (1+/C) ***                | 90 (1+/C) ***                        |
|               | 5      | -          | 90                | 90                           | 90                                   |
|               | 6      | -          | 95                | 80                           | 80                                   |
|               | 7      | -          | 90                | 70 (1+/C) ***                | 80 (1+/M) ***                        |
|               | 8      | -          | 50                | 25                           | 80                                   |

|    |   |    |               |               |
|----|---|----|---------------|---------------|
| 9  | - | 80 | 40 (1+/C) *** | 50 (1+/C) *** |
| 10 | - | 50 | 20 (1+/C) *** | 50 (1+/C) *** |
| 11 | - | 60 | 30 (1+/C) *** | 20 (1+/M) *** |
| 12 | - | 80 | 10            | 20            |
| 13 | - | 80 | 10            | 20            |
| 14 | - | 80 | 2             | 20            |
| 15 | - | 50 | 0             | 20            |
| 16 | - | 80 | 0             | 20 (1+/M) *** |
| 17 | - | 90 | 0             | 10            |
| 18 | - | 90 | 0             | 10            |
| 19 | - | 90 | 0             | 10            |
| 20 | - | 90 | 0             | 10            |
| 21 | - | 90 | 0             | 10            |
| 22 | - | 95 | 2             | 5             |
| 23 | - | 90 | 0             | 5             |
| 24 | - | 80 | 0             | 5             |
| 25 | - | 90 | 0             | 5             |
| 26 | - | 95 | 0             | 5             |
| 27 | - | 90 | 0             | 5             |
| 28 | - | 90 | 0             | 5             |
| 29 | - | 95 | 0             | 5             |
| 30 | - | 95 | 0             | 5             |
| 31 | - | 95 | 0             | 5             |
| 32 | - | 95 | 0             | 5             |
| 33 | - | 80 | 0             | 5             |
| 34 | - | 90 | 0             | 5             |
| 35 | - | 95 | 0             | 5             |
| 36 | - | 90 | 0             | 5             |
| 37 | - | 90 | 0             | 5             |
| 38 | - | 90 | 0             | 5             |
| 39 | - | 90 | 0             | 5             |
| 40 | - | 95 | 0             | 5             |
| 41 | - | 90 | 0             | 5             |
| 42 | - | 95 | 0             | 5             |
| 43 | - | 90 | 0             | 5             |
| 44 | - | 90 | 0             | 5             |
| 45 | - | 90 | 0             | 5             |
| 46 | - | 90 | 0             | 5             |
| 47 | - | 90 | 0             | 2             |
| 48 | - | 90 | 0             | 2             |
| 49 | - | 95 | 0             | 0             |
| 50 | - | 95 | 0             | 0             |
| 51 | - | 80 | 0             | 0             |
| 52 | - | 80 | 0             | 0             |
| 53 | - | 90 | 0             | 0             |
| 54 | - | 95 | 0             | 0             |
| 55 | - | 90 | 0             | 0             |
| 56 | - | 95 | 0             | 0             |
| 57 | - | 90 | 0             | 0             |
| 58 | - | 90 | 0             | 0             |



|         |    |         |    |               |    |
|---------|----|---------|----|---------------|----|
|         | 59 | -       | 90 | 0             | 0  |
|         | 60 | -       | 95 | 0             | 0  |
|         | 61 | -       | 90 | 0             | 0  |
|         | 62 | -       | 90 | 0             | 0  |
|         | 63 | -       | 90 | 0             | 0  |
|         | 64 | -       | 90 | 0             | 0  |
|         | 65 | -       | 90 | 0             | 0  |
|         | 66 | -       | 95 | 0             | 0  |
| PBL     | 1  | +       | 90 | 90            | 90 |
|         | 2  | +       | 90 | 60            | 60 |
|         | 3  | +       | 80 | 40            | 60 |
|         | 4  | nd      | 90 | 30            | 30 |
|         | 5  | +/HHV8+ | 60 | 0             | 5  |
|         | 6  | +       | 90 | 0             | 5  |
|         | 7  | +       | 90 | 0             | 2  |
|         | 8  | -       | 90 | 0             | 0  |
|         | 9  | +       | 60 | 0             | 0  |
| PEL     | 1  | -/HHV8+ | 80 | 90            | 80 |
|         | 2  | -/HHV8+ | 50 | 20            | 70 |
|         | 3  | -/HHV8+ | 90 | 60 (1+/C) *** | 60 |
|         | 4  | -/HHV8+ | 50 | 0             | 0  |
| ENKTCL  | 1  | +       | 90 | 90            | 90 |
|         | 2  | +       | 90 | 80            | 90 |
|         | 3  | +       | 50 | 70 (2+/C) *** | 80 |
|         | 4  | +       | 60 | 40            | 80 |
|         | 5  | nd      | 80 | 50            | 60 |
|         | 6  | nd      | 90 | 0             | 2  |
| EBV+ BL | 1  | +       | 90 | 0             | 5  |
|         | 2  | +       | 90 | 0             | 5  |
|         | 3  | +       | 90 | 0             | 5  |
|         | 4  | +       | 90 | 2             | 2  |
|         | 5  | +       | 90 | 0             | 2  |
|         | 6  | +       | 90 | 0             | 2  |
|         | 7  | +       | 95 | 0             | 2  |

\*  $\geq 2+$  membranous staining; \*\*  $\geq 2+$  membranous and/or cytoplasmic staining; \*\*\* scored as negative; DLBCL - diffuse large B-cell lymphoma; PTLD - posttransplant lymphoproliferative disorder; NOS - not otherwise specified; PBL - plasmablastic lymphoma; PEL - primary effusion lymphoma; ENKTCL - extranodal NK/T-cell lymphoma; BL - Burkitt lymphoma; nd - not determined; M - membranous; C - cytoplasmic; gray shading denotes cases scored as negative in either malignant cells and/or total cellularity.

Supplemental Table 3. Correlative Expression of PD-L1 by Malignant Cells and the Cellular Microenvironment of Examined Tumor Types

| Diagnosis                                               | PD-L1 Expression                    |     |     |           |
|---------------------------------------------------------|-------------------------------------|-----|-----|-----------|
|                                                         | Malignant cells : Total cellularity |     |     |           |
|                                                         | +/+                                 | +/- | -/+ | -/-       |
| Classical Hodgkin lymphoma (CHL)                        | <b>29</b>                           | 4   | 2   | 3         |
| Nodular sclerosis CHL                                   | <b>17</b>                           | 4   | 2   | 2         |
| Mixed cellularity CHL                                   | <b>7</b>                            |     |     | 1         |
| CHL-not otherwise specified (NOS)                       | <b>5</b>                            |     |     |           |
| Nodular lymphocyte predominant Hodgkin lymphoma         |                                     | 2   | 1   | <b>12</b> |
| Primary mediastinal large B-cell lymphoma               | <b>14</b>                           | 1   | 5   | 1         |
| T-cell/Histiocyte-rich large B-cell lymphoma            | <b>10</b>                           |     | 1   |           |
| EBV+ diffuse large B-cell lymphoma (DLBCL)              | <b>16</b>                           |     |     |           |
| EBV+ DLBCL of elderly                                   | <b>9</b>                            |     |     |           |
| EBV+ immunodeficiency associated DLBCL                  | <b>7</b>                            |     |     |           |
| EBV+ posttransplant lymphoproliferative disorder (PTLD) | <b>6</b>                            |     | 1   | 3         |
| EBV-negative PTLD                                       | 4                                   |     |     | 3         |
| DLBCL-NOS                                               | 7                                   |     | 2   | <b>57</b> |
| EBV+ Plasmablastic lymphoma                             | 4                                   |     |     | 5         |
| HHV8+ Primary effusion lymphoma                         | 2                                   |     | 1   | 1         |
| EBV+ Extranodal NK/T-cell lymphoma                      | 4                                   |     | 1   | 1         |
| EBV+ Burkitt lymphoma                                   |                                     |     |     | <b>7</b>  |
